# Supplementary material for: Social Life-Cycle Assessment in the Construction Industry: A Review of Case Studies
Source: Preprints.org preprint supplement (doi:10.20944/preprints202307.0763.v1), 2023-07-12
Supplement: Supplementary file 1 [file supplementary]

Figure 1: Research Screening

Figure 2: Stakeholder’s categories and subcategories from UNEP guidelines
